# Supplementary material for: New England harbor seal H3N8 influenza virus retains avian-like receptor specificity
Source: PubMed Central journal article supplement (PMC4757820; doi:10.1038/srep21428), 2016-02-18
Supplement: srep21428-s1.pdf [file srep21428-s1.pdf]

Supplementary material for:

**New England harbor seal H3N8 influenza virus retains avian-like receptor specificity and replicates in human lung cells**

Islam T. M. Hussein<sup>1</sup>, Florian Krammer<sup>3</sup>, Eric Ma<sup>1</sup>, Michael Estrin<sup>1</sup>, Karthik Viswanathan<sup>2</sup>, Nathan W. Stebbins<sup>1,2</sup>, Devin S. Quinlan<sup>1,2</sup>, Ram Sasisekharan<sup>1,2</sup>, and Jonathan Runstadler<sup>1\*</sup>

Department of Biological Engineering, Division of Comparative Medicine, Massachusetts Institute of Technology, Cambridge, MA, USA<sup>1</sup>; Koch Institute of Integrative Cancer Research, Massachusetts Institute of Technology, Cambridge, MA, USA<sup>2</sup>; Department of Microbiology, Icahn School of Medicine at Mount Sinai, New York, NY, USA<sup>3</sup>

### **Source code repository location and software dependencies for image quantitation:**

Source code for image quantification was written using a combination of custom Python scripts and IPython notebooks. The Python packages required include:

- scikit-image 0.9.3 and all of its dependencies,
- pandas 0.13.1 and all of its dependencies,
- IPython 2.1 and all of its dependencies.

We used Python 2.7.6 for all of our analysis. Instructions for running the IPython environment are not provided here, as sufficient tutorials are abound online.

The notebooks and their contents are described below:

- Notebook “0. Functions Tutorial.ipynb” illustrates how the image quantification is performed using scikit-image functions.
- Notebooks “1. Identify positive control threshold values.ipynb” and “2. Process all images.ipynb” are where the actual quantification is performed.

Source code is published on Github at <https://github.com/runstadler-lab/Seal-H3N8-Image-Analysis>.

## Supporting information legends:

**Fig. S1:** Representative images showing the areas of overlap between the red and green channels for human tissues. On each image, the top half is tracheal tissue staining, and the bottom half is lung tissue staining. Left panels: HA protein from human H3; middle panels: mock (control) staining; right panels: seal H3. Immunofluorescence images show nuclei (red) and purified HA protein (green) staining. Overlap images show the pixels where a defined area around the nuclei (as described in the methods section) and HA proteins overlap (white regions).

**Fig. S2:** Representative images showing the areas of overlap between the red and green channels for ferret tissues. Panels are analogous to Fig. S1.

**Table S1:** A list of all glycan hits (with p-values of less than 0.01) identified in our array screen for the human H3 using the sequential method

**Table S2:** A list of all glycan hits (with p-values of less than 0.01) identified in our array screen for the human H3 using the pre-complexing method

**Table S3:** A list of all glycan hits (with p-values of less than 0.01) identified in our array screen for the seal H3 using the sequential method

**Table S4:** A list of all glycan hits (with p-values of less than 0.01) identified in our array screen for the seal H3 using the pre-complexing method

Supplementary Figure S1

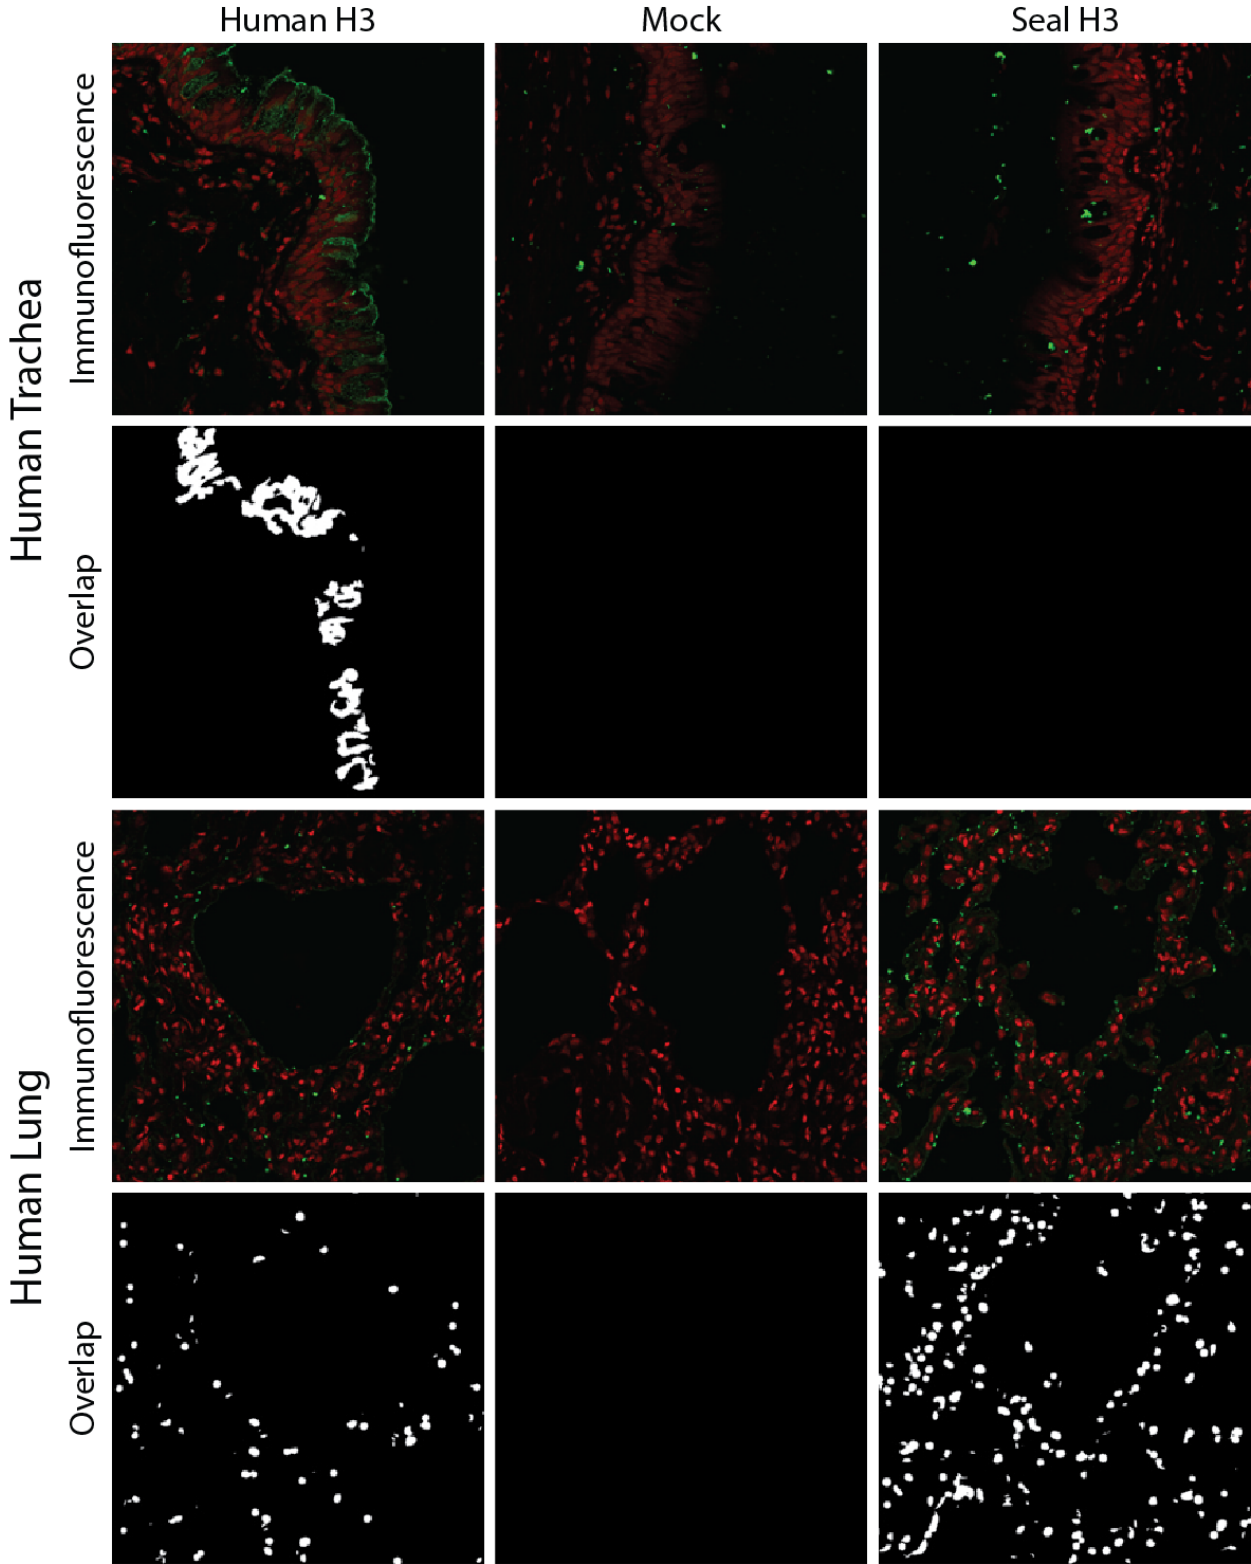

Supplementary Figure S2

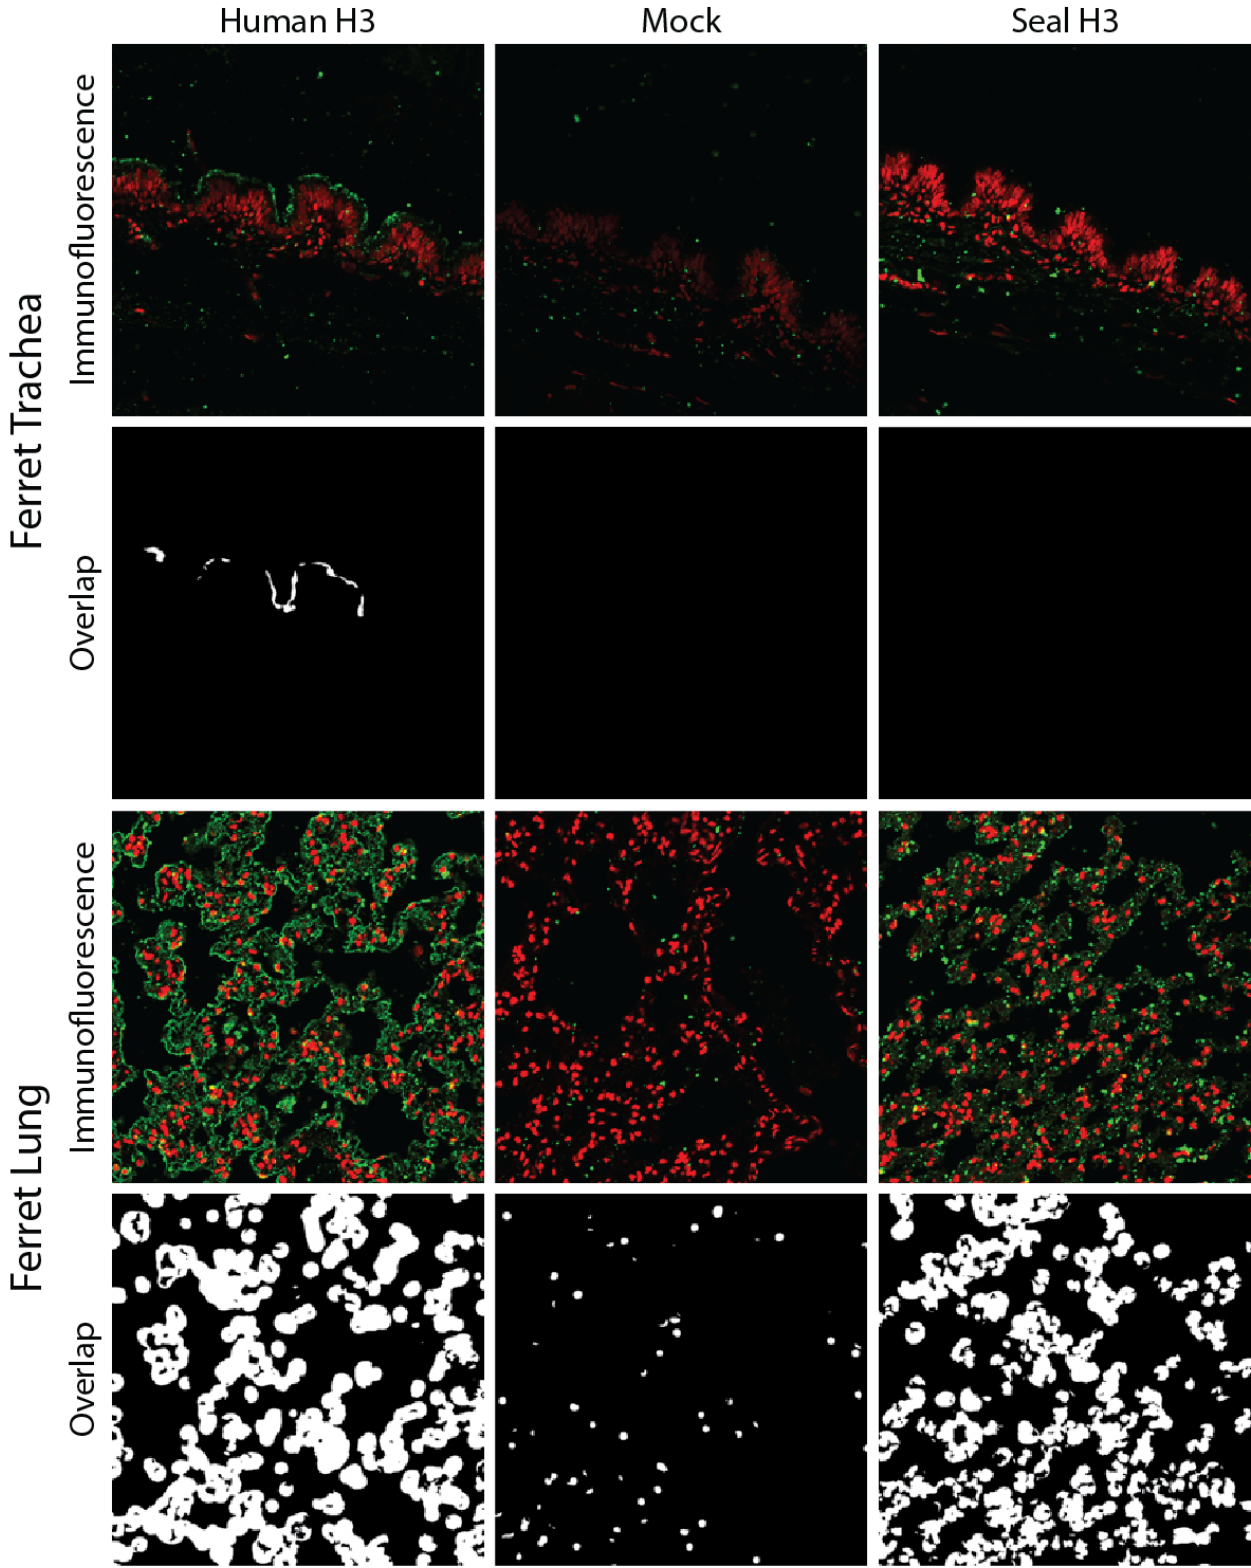

**Table S1:** A list of all glycan hits (with p-values of less than 0.01) identified in our array screen for the human H3 using the sequential method

| Glycan # | Glycan name                                                                                                                                                               | Average RFU | StDev | % CV | t-value    | p-value    |
|----------|---------------------------------------------------------------------------------------------------------------------------------------------------------------------------|-------------|-------|------|------------|------------|
| 332      | Neu5Acac2-6Galb1-4GlcNAcb1-3Galb1-4GlcNAcb-Sp0                                                                                                                            | 1208        | 28    | 2    | 42.5861448 | 1.4249E-05 |
| 606      | Neu5Acac2-6Galb1-4GlcNAcb1-3Galb1-4GlcNAcb1-3Galb1-4GlcNAcb1-2Manat-6(Neu5Acac2-6Galb1-4GlcNAcb1-3Galb1-4GlcNAcb1-3Galb1-4GlcNAcb1-2Manat-3)Manb1-4GlcNAcb1-4GlcNAcb-Sp12 | 741         | 89    | 12   | 8.3686024  | 0.00178894 |
| 252      | Neu5Acac2-3Galb1-4(Fuca1-3)(6S)GlcNAcb-Sp8                                                                                                                                | 554         | 33    | 6    | 17.0374516 | 0.00022023 |
| 270      | Neu5Acac2-6Galb1-4GlcNAcb1-3Galb1-4(Fuca1-3)GlcNAcb-Sp0                                                                                                                   | 385         | 33    | 9    | 11.6038849 | 0.00068729 |
| 271      | Neu5Acac2-6Galb1-4GlcNAcb1-3Galb1-4GlcNAcb-Sp0                                                                                                                            | 294         | 43    | 15   | 6.88087212 | 0.00314367 |
| 605      | Neu5Acac2-6Galb1-4GlcNAcb1-6(Neu5Acac2-6Galb1-4GlcNAcb1-3Galb1-4GlcNAcb1-3)GalNAca-Sp14                                                                                   | 222         | 20    | 9    | 11.1676948 | 0.0007694  |
| 393      | GalNAca1-3(Fuca1-2)Galb1-4GlcNAcb-Sp0                                                                                                                                     | 200         | 9     | 4    | 22.4104284 | 9.7272E-05 |
| 251      | Neu5Acac2-3Galb1-4(6S)GlcNAcb-Sp8                                                                                                                                         | 133         | 16    | 12   | 8.20008119 | 0.00189762 |
| 601      | Neu5Acac2-6Galb1-4GlcNAcb1-3Galb1-4GlcNAcb1-6Galb1-3GalNAca-Sp14                                                                                                          | 133         | 29    | 22   | 4.54224583 | 0.00999086 |
| 602      | Neu5Acac2-6Galb1-4GlcNAcb1-6(Galb1-3)GalNAca-Sp14                                                                                                                         | 85          | 15    | 17   | 5.76515903 | 0.00518632 |

**Table S2:** A list of all glycan hits (with p-values of less than 0.01) identified in our array screen for the human H3 using the pre-complexing method

| Glycan # | Glycan name                                                                                                                                                             | Average RFU | StDev | % CV | t-value    | p-value    |
|----------|-------------------------------------------------------------------------------------------------------------------------------------------------------------------------|-------------|-------|------|------------|------------|
| 270      | Neu5Aca2-6Galb1-4GlcNAcb1-3Galb1-4(Fuca1-3)GlcNAcb1-3Galb1-4(Fuca1-3)GlcNAcb-Sp0                                                                                        | 1545        | 89    | 6    | 17.4557169 | 0.00020489 |
| 332      | Neu5Aca2-6Galb1-4GlcNAcb1-3Galb1-4GlcNAcb1-3Galb1-4GlcNAcb-Sp0                                                                                                          | 1452        | 100   | 7    | 14.5784082 | 0.00034995 |
| 606      | Neu5Aca2-6Galb1-4GlcNAcb1-3Galb1-4GlcNAcb1-3Galb1-4GlcNAcb1-2Mana1-6(Neu5Aca2-6Galb1-4GlcNAcb1-3Galb1-4GlcNAcb1-3Galb1-4GlcNAcb1-2Mana1-3)Manb1-4GlcNAcb1-4GlcNAcb-Sp12 | 1151        | 136   | 12   | 8.46174265 | 0.00173239 |
| 252      | Neu5Aca2-3Galb1-4(Fuca1-3)(6S)GlcNAcb-Sp8                                                                                                                               | 279         | 46    | 17   | 6.01513825 | 0.00460359 |
| 251      | Neu5Aca2-3Galb1-4(6S)GlcNAcb-Sp8                                                                                                                                        | 250         | 48    | 19   | 5.20513244 | 0.00689051 |
| 601      | Neu5Aca2-6Galb1-4GlcNAcb1-3Galb1-4GlcNAcb1-6(Galb1-3)GalNAca-Sp14                                                                                                       | 248         | 11    | 4    | 23.570246  | 8.3665E-05 |
| 271      | Neu5Aca2-6Galb1-4GlcNAcb1-3Galb1-4GlcNAcb-Sp0                                                                                                                           | 226         | 30    | 13   | 7.62052922 | 0.00234529 |
| 605      | Neu5Aca2-6Galb1-4GlcNAcb1-3Galb1-4GlcNAcb1-6(Neu5Aca2-6Galb1-4GlcNAcb1-3Galb1-4GlcNAcb1-3)GalNAca-Sp14                                                                  | 176         | 13    | 7    | 13.9921456 | 0.00039524 |
| 481      | Neu5Aca2-6Galb1-4 GlcNAcb1-6(Neu5Aca2-6Galb1-4GlcNAcb1-3)GalNAca-Sp14                                                                                                   | 87          | 15    | 17   | 5.87927985 | 0.00490897 |
| 502      | Neu5Aca2-6GalNAcb1-4(6S)GlcNAcb-Sp8                                                                                                                                     | 77          | 10    | 12   | 8.08584913 | 0.0019763  |
| 393      | GalNAca1-3(Fuca1-2)Galb1-3GalNAca1-3(Fuca1-2)Galb1-4GlcNAcb-Sp0                                                                                                         | 76          | 18    | 24   | 4.19326671 | 0.01236847 |
| 55       | Neu5Aca2-6Galb1-4GlcNAcb1-2Mana1-6(Neu5Aca2-6Galb1-4GlcNAcb1-2Mana1-3)Manb1-4GlcNAcb1-4GlcNAcb-Sp12                                                                     | 59          | 10    | 18   | 5.70878935 | 0.00533091 |

**Table S3:** A list of all glycan hits (with p-values of less than 0.01) identified in our array screen for the seal H3 using the sequential method

| Glycan # | Glycan name                                                                                                                                                                | Average RFU | StDev | % CV | t-value    | p-value    |
|----------|----------------------------------------------------------------------------------------------------------------------------------------------------------------------------|-------------|-------|------|------------|------------|
| 241      | Neu5Aca2-3Galb1-4(Neu5Aca2-3Galb1-3)GlcNAcb-Sp8                                                                                                                            | 887         | 78    | 9    | 11.3687944 | 0.00073001 |
| 474      | Neu5Aca2-3Galb1-3GlcNAcb1-6(Neu5Aca2-3Galb1-3GlcNAcb1-2)Mana1-6(Neu5Aca2-3Galb1-3GlcNAcb1-2)Mana1-3)Manb1-4GlcNAcb1-4GlcNAcb-Sp19                                          | 720         | 32    | 4    | 22.6667311 | 9.4024E-05 |
| 325      | Neu5Aca2-3Galb1-4GlcNAcb1-2Mana1-6(Neu5Aca2-3Galb1-4GlcNAcb1-2)Mana1-3)Manb1-4GlcNAcb1-4GlcNAcb-Sp12                                                                       | 442         | 49    | 11   | 9.10841969 | 0.00139824 |
| 471      | Neu5Aca2-3Galb1-4GlcNAcb1-6(Neu5Aca2-3Galb1-4GlcNAcb1-3)GalNAca-Sp14                                                                                                       | 415         | 39    | 9    | 10.7365182 | 0.00086387 |
| 258      | Neu5Aca2-3Galb1-4GlcNAcb1-3Galb1-4GlcNAcb1-3Galb1-4GlcNAcb-Sp0                                                                                                             | 409         | 40    | 10   | 10.3401205 | 0.00096479 |
| 252      | Neu5Aca2-3Galb1-4(Fuca1-3)(6S)GlcNAcb-Sp8                                                                                                                                  | 396         | 44    | 11   | 8.91702011 | 0.00148751 |
| 257      | Neu5Aca2-3Galb1-4(Fuca1-3)GlcNAcb1-3Galb1-4GlcNAcb-Sp8                                                                                                                     | 345         | 29    | 8    | 11.7719198 | 0.00065876 |
| 240      | Neu5Aca2-3Galb1-3(Fuca1-4)GlcNAcb1-3Galb1-4(Fuca1-3)GlcNAcb-Sp0                                                                                                            | 331         | 28    | 8    | 11.9713096 | 0.00062692 |
| 242      | Neu5Aca2-3Galb1-3(6S)GalNAca-Sp8                                                                                                                                           | 311         | 67    | 22   | 4.62451086 | 0.0095186  |
| 331      | Neu5Aca2-3Galb1-3(Fuca1-4)GlcNAcb1-3Galb1-3(Fuca1-4)GlcNAcb-Sp0                                                                                                            | 298         | 38    | 13   | 7.87660374 | 0.00213197 |
| 234      | Neu5Aca2-3Galb1-3GalNAcb1-4(Neu5Aca2-3Galb1-4GlcNAcb-Sp0)                                                                                                                  | 283         | 56    | 20   | 5.07749635 | 0.00737808 |
| 462      | Neu5Aca2-3Galb1-4GlcNAcb1-6(Neu5Aca2-3Galb1-4GlcNAcb1-2)Mana1-6(GlcNAcb1-4)(Neu5Aca2-3Galb1-4GlcNAcb1-4)(Neu5Aca2-3Galb1-4GlcNAcb1-2)Mana1-3)Manb1-4GlcNAcb1-4GlcNAcb-Sp21 | 279         | 49    | 18   | 5.69981396 | 0.00535441 |
| 239      | Neu5Aca2-3Galb1-3(Fuca1-4)GlcNAcb-Sp8                                                                                                                                      | 272         | 52    | 19   | 5.20510879 | 0.0068906  |
| 243      | Neu5Aca2-6(Neu5Aca2-3Galb1-3)GalNAca-Sp8                                                                                                                                   | 266         | 35    | 13   | 7.50691175 | 0.00244899 |
| 261      | Neu5Aca2-3Galb1-4GlcNAcb1-3Galb1-4GlcNAcb-Sp0                                                                                                                              | 258         | 47    | 18   | 5.4424445  | 0.00609034 |
| 260      | Neu5Aca2-3Galb1-4GlcNAcb-Sp8                                                                                                                                               | 243         | 14    | 6    | 16.8252088 | 0.00022859 |
| 251      | Neu5Aca2-3Galb1-4(6S)GlcNAcb-Sp8                                                                                                                                           | 235         | 23    | 10   | 10.040618  | 0.00105163 |
| 264      | Neu5Aca2-3Galb1-4Glc-Sp8                                                                                                                                                   | 234         | 44    | 19   | 5.32776318 | 0.00646094 |
| 259      | Neu5Aca2-3Galb1-4GlcNAcb-Sp0                                                                                                                                               | 222         | 16    | 7    | 13.8160411 | 0.00041035 |
| 460      | Neu5Aca2-3Galb1-4GlcNAcb1-4Mana1-6(GlcNAcb1-4)(Neu5Aca2-3Galb1-4GlcNAcb1-4)(Neu5Aca2-3Galb1-4GlcNAcb1-2)Mana1-3)Manb1-4GlcNAcb1-4GlcNAcb-Sp21                              | 210         | 15    | 7    | 13.6738143 | 0.00042313 |
| 263      | Neu5Aca2-3Galb1-4Glc-Sp0                                                                                                                                                   | 209         | 46    | 22   | 4.54039086 | 0.01000185 |
| 255      | Neu5Aca2-3Galb1-4(Fuca1-3)GlcNAcb-Sp8                                                                                                                                      | 194         | 43    | 22   | 4.46774413 | 0.01044509 |
| 534      | Neu5Aca2-3Galb1-4(Fuca1-3)GlcNAcb1-2Mana-Sp0                                                                                                                               | 193         | 56    | 29   | 3.48633866 | 0.01993606 |
| 604      | GlcNAcb1-6(Neu5Aca2-3Galb1-3)GalNAca-Sp14                                                                                                                                  | 178         | 29    | 17   | 6.05739783 | 0.0045137  |
| 479      | Neu5Aca2-3Galb1-4GlcNAcb1-6GalNAca-Sp14                                                                                                                                    | 165         | 26    | 16   | 6.44593893 | 0.00378598 |
| 247      | Neu5Aca2-3Galb1-3GlcNAcb1-3Galb1-4GlcNAcb-Sp0                                                                                                                              | 164         | 29    | 18   | 5.57986315 | 0.00568202 |
| 223      | Neu5Aca2-3Galb1-3GalNAca-Sp8                                                                                                                                               | 148         | 36    | 24   | 4.12550768 | 0.01291245 |
| 393      | GalNAca1-3(Fuca1-2)Galb1-3GalNAca1-3(Fuca1-2)Galb1-4GlcNAcb-Sp0                                                                                                            | 147         | 35    | 24   | 4.22994313 | 0.01208634 |
| 245      | Neu5Aca2-3Galb-Sp8                                                                                                                                                         | 144         | 16    | 11   | 9.01166287 | 0.00144245 |
| 238      | Neu5Aca2-3Galb1-3(6S)GlcNAcb-Sp8                                                                                                                                           | 92          | 14    | 15   | 6.7029754  | 0.00338759 |
| 526      | Neu5Aca2-3Galb1-3GlcNAcb1-2Mana-Sp0                                                                                                                                        | 86          | 24    | 28   | 3.63263254 | 0.01796348 |
| 282      | Neu5Gca2-3Galb1-4(Fuca1-3)GlcNAcb-Sp0                                                                                                                                      | 70          | 16    | 23   | 4.32734243 | 0.01137641 |
| 249      | Neu5Aca2-3Galb1-3GlcNAcb-Sp0                                                                                                                                               | 64          | 5     | 8    | 11.8934885 | 0.0006391  |
| 596      | Neu5Aca2-3Galb1-4GlcNAcb1-3Galb1-4GlcNAcb1-6(Neu5Aca2-3Galb1-4GlcNAcb1-3Galb1-4GlcNAcb1-3)GalNAca-Sp14                                                                     | 53          | 9     | 18   | 5.60638983 | 0.00560735 |
| 395      | Gala1-3Galb1-3(Fuca1-4)GlcNAcb1-2Mana1-6(Gala1-3Galb1-3(Fuca1-4)GlcNAcb1-2)Mana1-3)Manb1-4GlcNAcb1-4GlcNAcb-Sp19                                                           | 51          | 9     | 17   | 5.7547986  | 0.0052125  |
| 491      | Neu5Aca2-3Galb1-3GlcNAcb1-6GalNAca-Sp14                                                                                                                                    | 48          | 6     | 12   | 8.69493248 | 0.00160081 |
| 461      | Neu5Aca2-3Galb1-4GlcNAcb1-6(Neu5Aca2-3Galb1-4GlcNAcb1-2)Mana1-6(GlcNAcb1-4)(Neu5Aca2-3Galb1-4GlcNAcb1-2)Mana1-3)Manb1-4GlcNAcb1-4GlcNAcb-Sp21                              | 40          | 5     | 12   | 8.08110759 | 0.00197966 |



**Table S4:** A list of all glycan hits (with p-values of less than 0.01) identified in our array screen for the seal H3 using the pre-complexing method

| Glycan # | Glycan name                                                                                                                                                                | Average RFU | StDev | % CV | t-value    | p-value    |
|----------|----------------------------------------------------------------------------------------------------------------------------------------------------------------------------|-------------|-------|------|------------|------------|
| 317      | Neu5Aca2-3Galb1-4GlcNAcb1-6(Neu5Aca2-3Galb1-3)GalNAca-Sp14                                                                                                                 | 2060        | 112   | 5    | 18.3901594 | 0.00017542 |
| 325      | Neu5Aca2-3Galb1-4GlcNAcb1-2Mana1-6(Neu5Aca2-3Galb1-4GlcNAcb1-2Mana1-3)Manb1-4GlcNAcb1-4GlcNAcb-Sp12                                                                        | 1326        | 159   | 12   | 8.31862329 | 0.0018203  |
| 474      | Neu5Aca2-3Galb1-3GlcNAcb1-6(Neu5Aca2-3Galb1-3GlcNAcb1-2)Mana1-6(Neu5Aca2-3Galb1-3GlcNAcb1-2Mana1-3)Manb1-4GlcNAcb1-4GlcNAcb-Sp19                                           | 1278        | 47    | 4    | 27.2480309 | 5.4242E-05 |
| 252      | Neu5Aca2-3Galb1-4(Fuca1-3)(6S)GlcNAcb-Sp8                                                                                                                                  | 1137        | 74    | 7    | 15.355428  | 0.00029996 |
| 241      | Neu5Aca2-3Galb1-4(Neu5Aca2-3Galb1-3)GlcNAcb-Sp8                                                                                                                            | 1136        | 34    | 3    | 33.8013306 | 2.8462E-05 |
| 471      | Neu5Aca2-3Galb1-4GlcNAcb1-6(Neu5Aca2-3Galb1-4GlcNAcb1-3)GalNAca-Sp14                                                                                                       | 1102        | 66    | 6    | 16.81335   | 0.00022907 |
| 258      | Neu5Aca2-3Galb1-4GlcNAcb1-3Galb1-4GlcNAcb1-3Galb1-4GlcNAcb-Sp0                                                                                                             | 946         | 23    | 2    | 42.0284069 | 1.4823E-05 |
| 462      | Neu5Aca2-3Galb1-4GlcNAcb1-6(Neu5Aca2-3Galb1-4GlcNAcb1-2)Mana1-6(GlcNAcb1-4)(Neu5Aca2-3Galb1-4GlcNAcb1-4)(Neu5Aca2-3Galb1-4GlcNAcb1-2)Mana1-3)Manb1-4GlcNAcb1-4GlcNAcb-Sp21 | 916         | 66    | 7    | 13.7836313 | 0.00041322 |
| 247      | Neu5Aca2-3Galb1-3GlcNAcb1-3Galb1-4GlcNAcb-Sp0                                                                                                                              | 902         | 45    | 5    | 20.2311528 | 0.000132   |
| 253      | Neu5Aca2-3Galb1-4(Fuca1-3)GlcNAcb1-3Galb1-4(Fuca1-3)GlcNAcb1-3Galb1-4(Fuca1-3)GlcNAcb-Sp0                                                                                  | 837         | 25    | 3    | 33.0067588 | 3.0563E-05 |
| 483      | Neu5Aca2-3Galb1-4GlcNAcb1-2Mana1-6(Neu5Aca2-3Galb1-4GlcNAcb1-2Mana1-3)Manb1-4GlcNAcb1-4(Fuca1-6)GlcNAcb-Sp24                                                               | 814         | 43    | 5    | 18.870182  | 0.00016246 |
| 331      | Neu5Aca2-3Galb1-3(Fuca1-4)GlcNAcb1-3Galb1-3(Fuca1-4)GlcNAcb-Sp0                                                                                                            | 764         | 34    | 4    | 22.6495442 | 9.4237E-05 |
| 240      | Neu5Aca2-3Galb1-3(Fuca1-4)GlcNAcb1-3Galb1-4(Fuca1-3)GlcNAcb-Sp0                                                                                                            | 712         | 41    | 6    | 17.3921281 | 0.00020713 |
| 460      | Neu5Aca2-3Galb1-4GlcNAcb1-4Mana1-6(GlcNAcb1-4)(Neu5Aca2-3Galb1-4GlcNAcb1-2)Mana1-3)Manb1-4GlcNAcb1-4GlcNAcb-Sp21                                                           | 697         | 28    | 4    | 24.9037829 | 7.0979E-05 |
| 255      | Neu5Aca2-3Galb1-4(Fuca1-3)GlcNAcb-Sp8                                                                                                                                      | 680         | 49    | 7    | 13.9234527 | 0.00040105 |
| 534      | Neu5Aca2-3Galb1-4(Fuca1-3)GlcNAcb1-2Mana-Sp0                                                                                                                               | 678         | 17    | 3    | 39.7076689 | 1.7572E-05 |
| 256      | Neu5Aca2-3Galb1-4(Fuca1-3)GlcNAcb1-3Galb-Sp8                                                                                                                               | 662         | 31    | 5    | 21.0415831 | 0.0001174  |
| 223      | Neu5Aca2-3Galb1-3GalNAca-Sp8                                                                                                                                               | 626         | 70    | 11   | 8.92231826 | 0.00148494 |
| 242      | Neu5Aca2-3Galb1-3(6S)GalNAca-Sp8                                                                                                                                           | 593         | 36    | 6    | 16.6701826 | 0.00023498 |
| 243      | Neu5Aca2-6(Neu5Aca2-3Galb1-3)GalNAca-Sp8                                                                                                                                   | 587         | 137   | 23   | 4.2757457  | 0.01174556 |
| 234      | Neu5Aca2-3Galb1-3GalNAcb1-4(Neu5Aca2-3)Galb1-4Glc-Sp0                                                                                                                      | 587         | 48    | 8    | 12.1114663 | 0.00060575 |
| 261      | Neu5Aca2-3Galb1-4GlcNAcb1-3Galb1-4GlcNAcb-Sp0                                                                                                                              | 566         | 33    | 6    | 17.3963678 | 0.00020698 |
| 251      | Neu5Aca2-3Galb1-4(6S)GlcNAcb-Sp8                                                                                                                                           | 556         | 224   | 40   | 2.47870161 | 0.04468631 |
| 264      | Neu5Aca2-3Galb1-4Glc-Sp8                                                                                                                                                   | 552         | 48    | 9    | 11.4950275 | 0.00070665 |
| 604      | GlcNAcb1-6(Neu5Aca2-3Galb1-3)GalNAca-Sp14                                                                                                                                  | 539         | 79    | 15   | 6.8178467  | 0.00322735 |
| 257      | Neu5Aca2-3Galb1-4(Fuca1-3)GlcNAcb1-3Galb1-4GlcNAcb-Sp8                                                                                                                     | 528         | 19    | 4    | 28.0564279 | 4.9701E-05 |
| 294      | Neu5Aca2-3Galb1-3GlcNAcb1-3Galb1-3GlcNAcb-Sp0                                                                                                                              | 455         | 27    | 6    | 16.972784  | 0.00022273 |
| 461      | Neu5Aca2-3Galb1-4GlcNAcb1-6(Neu5Aca2-3Galb1-4GlcNAcb1-2)Mana1-6(GlcNAcb1-4)(Neu5Aca2-3Galb1-4GlcNAcb1-2)Mana1-3)Manb1-4GlcNAcb1-4GlcNAcb-Sp21                              | 451         | 40    | 9    | 11.2096083 | 0.00076097 |
| 259      | Neu5Aca2-3Galb1-4GlcNAcb-Sp0                                                                                                                                               | 436         | 34    | 8    | 12.8488605 | 0.00050869 |
| 239      | Neu5Aca2-3Galb1-3(Fuca1-4)GlcNAcb-Sp8                                                                                                                                      | 435         | 17    | 4    | 25.7441802 | 6.4276E-05 |
| 260      | Neu5Aca2-3Galb1-4GlcNAcb-Sp8                                                                                                                                               | 426         | 39    | 9    | 10.8200019 | 0.00084443 |
| 224      | Neu5Aca2-3Galb1-3GalNAca-Sp14                                                                                                                                              | 413         | 55    | 13   | 7.48724511 | 0.00246755 |
| 246      | Neu5Aca2-3Galb1-3GalNAcb1-3Gala1-4Galb1-4Glc-Sp0                                                                                                                           | 396         | 41    | 10   | 9.69303455 | 0.00116591 |
| 263      | Neu5Aca2-3Galb1-4Glc-Sp0                                                                                                                                                   | 391         | 9     | 2    | 45.9511865 | 1.1345E-05 |
| 254      | Neu5Aca2-3Galb1-4(Fuca1-3)GlcNAcb-Sp0                                                                                                                                      | 365         | 36    | 10   | 10.0799859 | 0.00103964 |
| 526      | Neu5Aca2-3Galb1-3GlcNAcb1-2Mana-Sp0                                                                                                                                        | 358         | 57    | 16   | 6.31385821 | 0.0040148  |
| 249      | Neu5Aca2-3Galb1-3GlcNAcb-Sp0                                                                                                                                               | 357         | 114   | 32   | 3.14382043 | 0.02575548 |
| 441      | Neu5Aca2-3Galb1-4GlcNAcb1-3Galb-Sp8                                                                                                                                        | 338         | 18    | 5    | 19.1834905 | 0.00015468 |
| 272      | Neu5Aca2-6Galb1-4Glc-Sp0                                                                                                                                                   | 308         | 31    | 10   | 10.0580109 | 0.00104631 |
| 250      | Neu5Aca2-3Galb1-3GlcNAcb-Sp8                                                                                                                                               | 307         | 26    | 8    | 11.9473938 | 0.00063063 |
| 600      | Neu5Aca2-3Galb1-4GlcNAcb1-3Galb1-4GlcNAcb1-6(Galb1-3)GalNAca-Sp14                                                                                                          | 303         | 53    | 18   | 5.69169235 | 0.0053758  |
| 238      | Neu5Aca2-3Galb1-3(6S)GlcNAcb-Sp8                                                                                                                                           | 296         | 48    | 16   | 6.17040844 | 0.00428437 |
| 295      | Neu5Aca2-3Galb1-4GlcNAcb1-3Galb1-3GlcNAcb-Sp0                                                                                                                              | 242         | 47    | 20   | 5.12142999 | 0.00720532 |
| 244      | Neu5Aca2-6(Neu5Aca2-3Galb1-3)GalNAca-Sp14                                                                                                                                  | 226         | 16    | 7    | 13.8797182 | 0.0004048  |
| 11       | Neu5Acb-Sp8                                                                                                                                                                | 215         | 61    | 29   | 3.48982678 | 0.0198859  |
| 326      | Neu5Aca2-3Galb1-4GlcNAcb1-2Mana1-6(Neu5Aca2-6Galb1-4GlcNAcb1-2Mana1-3)Manb1-4GlcNAcb1-4GlcNAcb-Sp12                                                                        | 190         | 22    | 12   | 8.5114841  | 0.00170315 |
| 596      | Neu5Aca2-3Galb1-4GlcNAcb1-3Galb1-4GlcNAcb1-6(Neu5Aca2-3Galb1-4GlcNAcb1-3Galb1-4GlcNAcb1-3)GalNAca-Sp14                                                                     | 156         | 19    | 12   | 8.02053172 | 0.00202323 |
| 491      | Neu5Aca2-3Galb1-3GlcNAcb1-6GalNAca-Sp14                                                                                                                                    | 143         | 22    | 15   | 6.52208437 | 0.00366181 |
| 459      | Neu5Aca2-3Galb1-4GlcNAcb1-2Mana1-6(Neu5Aca2-3Galb1-4GlcNAcb1-2)Mana1-3)Manb1-4GlcNAcb1-4GlcNAcb-Sp21                                                                       | 138         | 8     | 6    | 17.5037591 | 0.00020322 |
| 322      | Neu5Aca2-8Neu5Aca2-8Neu5Acb-Sp8                                                                                                                                            | 124         | 46    | 37   | 2.66667911 | 0.03795246 |
| 592      | Neu5Aca2-3Galb1-4GlcNAcb1-3Galb1-4GlcNAcb1-3GalNAca-Sp14                                                                                                                   | 118         | 50    | 42   | 2.37829498 | 0.0488412  |
| 376      | Neu5Aca2-3Galb1-4GlcNAcb1-3GalNAcb-Sp14                                                                                                                                    | 111         | 32    | 29   | 3.45421496 | 0.02040568 |
| 329      | Neu5_9Ac2a2-3Galb1-3GlcNAcb-Sp0                                                                                                                                            | 107         | 16    | 15   | 6.82865537 | 0.00321279 |
| 282      | Neu5Gca2-3Galb1-4(Fuca1-3)GlcNAcb-Sp0                                                                                                                                      | 103         | 10    | 9    | 10.1722484 | 0.00086964 |
| 393      | GalNAca1-3(Fuca1-2)Galb1-3GalNAca1-3(Fuca1-2)Galb1-4GlcNAcb-Sp0                                                                                                            | 94          | 7     | 7    | 14.0127979 | 0.00039351 |
| 46       | Neu5Aca2-3(6S)Galb1-4GlcNAcb-Sp8                                                                                                                                           | 61          | 18    | 29   | 3.4037975  | 0.02117151 |
| 607      | Neu5Aca2-3Galb1-4GlcNAcb1-3Galb1-4GlcNAcb1-2Mana1-6(Neu5Aca2-3Galb1-4GlcNAcb1-3Galb1-4GlcNAcb1-3Galb1-4GlcNAcb1-2)Mana1-3)Manb1-4GlcNAcb1-4GlcNAcb-Sp12                    | 60          | 17    | 28   | 3.59145108 | 0.01849255 |
| 603      | Neu5Aca2-3Galb1-4GlcNAcb1-3Galb1-4GlcNAcb1-2Mana1-6(Neu5Aca2-3Galb1-4GlcNAcb1-3Galb1-4GlcNAcb1-2)Mana1-3)Manb1-4GlcNAcb1-4GlcNAcb-Sp12                                     | 60          | 13    | 21   | 4.67896627 | 0.00922184 |
| 237      | Neu5Aca2-3GalNAcb1-4GlcNAcb-Sp0                                                                                                                                            | 58          | 21    | 36   | 2.75330858 | 0.03527319 |
| 450      | Gala1-3(Fuca1-2)Galb1-4GlcNAcb1-6(Gala1-3(Fuca1-2)Galb1-4GlcNAcb1-3)GalNAca-Sp14                                                                                           | 48          | 17    | 35   | 2.83924971 | 0.03284357 |
| 362      | Fuca1-2Galb1-4(Fuca1-3)GlcNAcb1-2Mana1-6(Fuca1-2Galb1-4(Fuca1-3)GlcNAcb1-2)Mana1-3)Manb1-4GlcNAcb1-4GlcNAcb-Sp20                                                           | 43          | 12    | 28   | 3.54099562 | 0.01916821 |
| 328      | Neu5_9Ac2a2-3Galb1-4GlcNAcb-Sp0                                                                                                                                            | 41          | 7     | 17   | 5.76655319 | 0.00518281 |
